# Supplementary material for: Selective methanation of CO over HZSM-5 supported Ni and Ni–Ru catalysts
Source: Royal Society of Chemistry journal article supplement (doi:10.1039/d3re00413a), 2023-12-04
Supplement: d3re00413a1.pdf [file d3re00413a1.pdf]

## Supporting Information

### Selective methanation of CO over HZSM-5 supported Ni and Ni-Ru catalysts

Yiding Yang,<sup>†a</sup> Xinyu Wu,<sup>†a</sup> Yuchang Zhang,<sup>a</sup> Haojie Geng,<sup>a</sup> Siyu Yu<sup>\*a</sup> and Shetian Liu<sup>\*a, b</sup>

<sup>a</sup>School of Chemistry & Chemical Engineering, Southwest University, Chongqing, 400715, China.

<sup>b</sup>School of Chemistry & Chemical Engineering, Northeast Petroleum University, Daqing, 163000, China

<sup>†</sup> equally contributed

E-mail: yusiyu@swu.edu.cn; sl20180110@swu.edu.cn

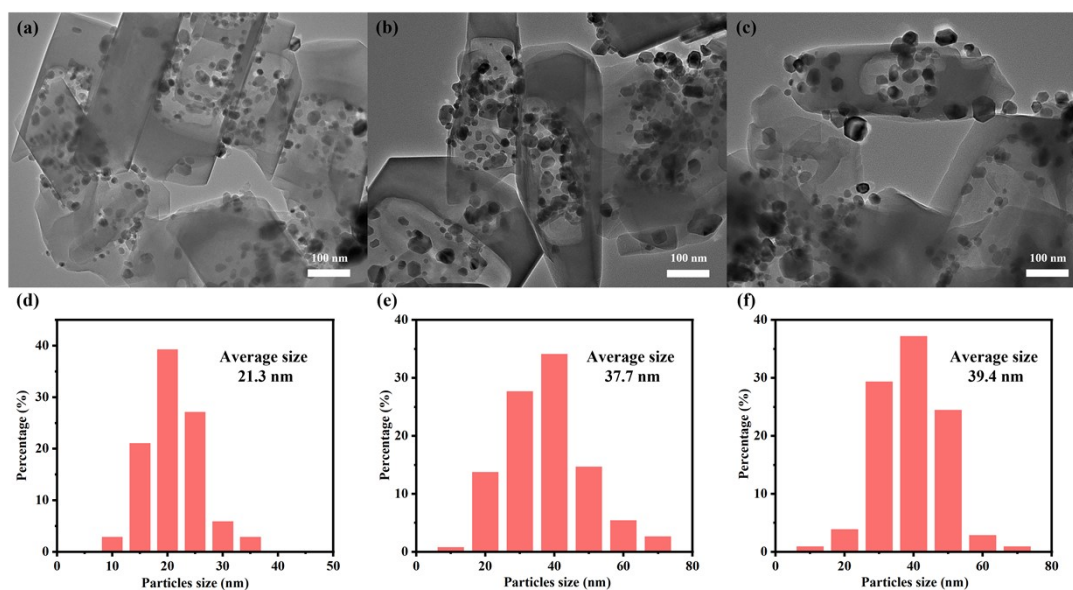

**Figure S1** TEM images (a, b, c) and Ni particle size distributions (d, e, f) of 15Ni/HZSM-5(38) (a, d), 20Ni/HZSM-5(38) (b, e), and 25Ni/HZSM-5(38) (c, f). The counted number of Ni particles was over 100.

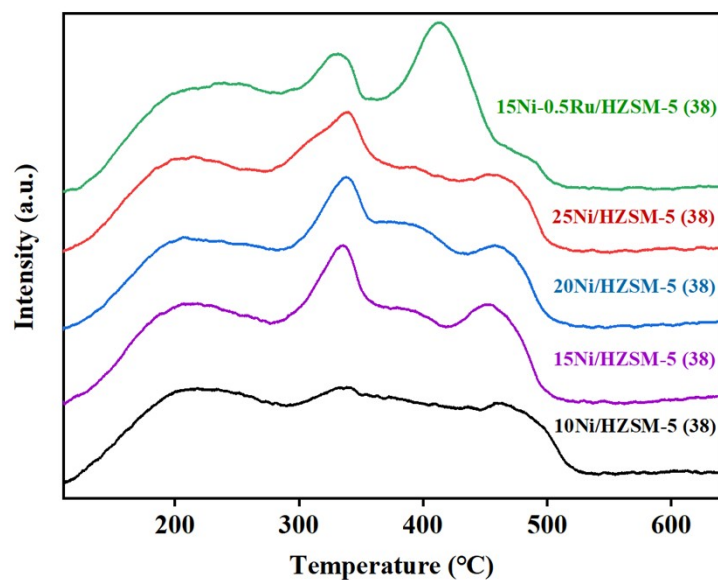

**Figure S2** NH<sub>3</sub>-TPD profiles of xNi/HZSM-5(38) and 15Ni-0.5Ru/HZSM-5(38) after reduction.

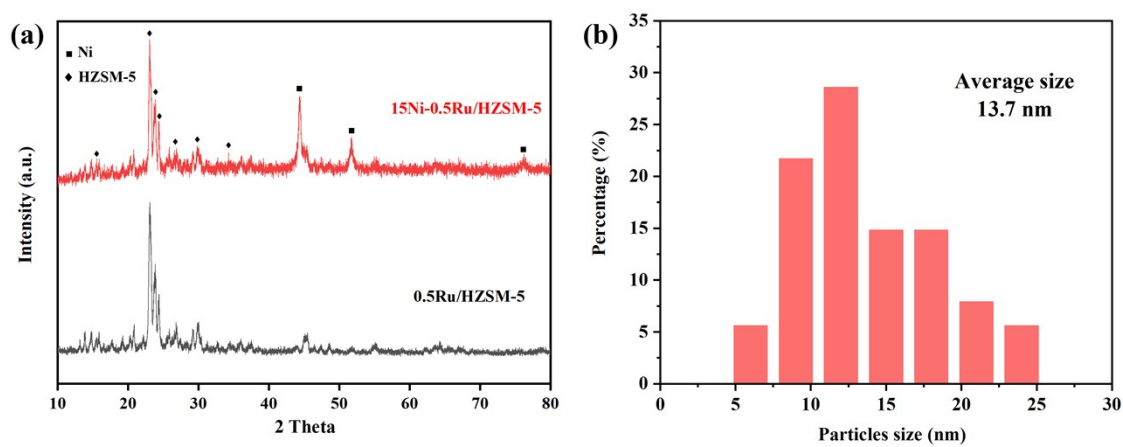

**Figure S3** XRD profiles of 0.5Ru/HZSM-5(38), 15Ni-0.5Ru/HZSM-5(38) (a); Ni particle size distribution of 15Ni-0.5Ru/HZSM-5(38) according to TEM images (b). The counted number of Ni particles was over 100.

**Table S1** Contents of different NiO compositions on 10Ni/HZSM-5(x) catalysts after calcination.

| Sample           | Contents (%) |                      |          |
|------------------|--------------|----------------------|----------|
|                  | free NiO     | highly dispersed NiO | bulk NiO |
| 10Ni/HZSM-5(38)  | 2.8          | 84.1                 | 13.1     |
| 10Ni/HZSM-5(70)  | 6.5          | 78.9                 | 14.6     |
| 10Ni/HZSM-5(170) | 4.5          | 80.9                 | 14.6     |

**Table S2** Optimum performance of Ni/HZSM-5 catalysts in CO-SMET process.

| Sample           | Temperature (°C) | Residual CO (ppm) | S <sub>CO</sub> (%) |
|------------------|------------------|-------------------|---------------------|
| 10Ni/HZSM-5(38)  | 250              | 209               | 99                  |
| 10Ni/HZSM-5(70)  | 280              | 598               | 94                  |
| 10Ni/HZSM-5(170) | 300              | 3528              | 84                  |
| 15Ni/HZSM-5(38)  | 230              | 67                | 98                  |
| 20Ni/HZSM-5(38)  | 240              | 92                | 95                  |
| 25Ni/HZSM-5(38)  | 270              | 132               | 91                  |
